# Supplementary material for: Dual-Signal-Encoded Barcodes with Low Background Signal for High-Sensitivity Analysis of Multiple Tumor Markers
Source: MDPI journal article supplement (doi:10.3390/chemosensors10040142), 2022-04-09
Supplement: s1 [file s1]

Archive with 1 entries (1 files):
- chemosensors-1666388-supplementary.pdf
