# Supplementary material for: Dual-Signal-Encoded Barcodes with Low Background Signal for High-Sensitivity Analysis of Multiple Tumor Markers
Source: MDPI journal article supplement (doi:10.3390/chemosensors10040142), 2022-04-09
Supplement: s1 [file s1 › chemosensors-1666388-supplementary.pdf]

## Supplementary Materials

# Dual-Signal-Encoded Barcodes with Low Background Signal for High-Sensitivity Analysis of Multiple Tumor Markers

Bo Zhang, Wan-Sheng Tang and Shou-Nian Ding \*

School of Chemistry and Chemical Engineering, Southeast University, Nanjing 211189, China; zhangbo@seu.edu.cn (B.Z.); wstang@seu.edu.cn (W.-S.T.)

\* Correspondence: snding@seu.edu.cn; Fax: +86-25-5209-0621

## Chemical and Reagents

Admium chloride hydrate ( $\text{CdCl}_2 \cdot 2.5\text{H}_2\text{O}$ , 99.0%), sodium borohydride ( $\text{NaBH}_4$ ,  $\geq 96.0\%$ ), tellurium powder (Te, 99.9%), tetraethyl orthosilicate (TEOS,  $\geq 28.4\%$ ) and ammonium hydroxide ( $\text{NH}_3 \cdot \text{H}_2\text{O}$ , 25wt%  $\text{NH}_3$  in water) were purchased from Sinopharm Chemical Reagent Co., Ltd (Shanghai, China). Poly(acrylic acid) (PAA) was purchased from Shanghai Macklin Biochemical Co., Ltd. (Shanghai, China). Poly(vinylpyrrolidone) PVP was supplied by Energy Chemical. 2-methoxyethanol, styrene, 2,2-azobis(isobutyronitrile) (AIBN), N-hydroxysuccinimide (NHS, 98%), 3-mercaptopropionic acid (MPA, 98%) and (3-aminopropyl) triethoxysilane (APTES, 97%) were supplied by Aladdin Industrial Corporation (Southern California, USA). N-(3-dimethylaminopropyl)-N'-ethylcarbodiimide hydrochloride (EDC), a 2-(N-morpholino) ethanesulfonic acid hydrate (MES) and N-Hydroxysuccinimide (NHS) were purchased from Sigma-Aldrich (Saint Louis, USA). Bovine serum albumin (BSA) was obtained from Sangon Biotech Co., Ltd (Shanghai, China). PS microbeads and silica ( $\text{SiO}_2$ ) microbeads were supplied by Suzhou Nanomicro Technology Co., Ltd. (Suzhou, China). The inorganic salts ( $\text{Na}_2\text{HPO}_4 \cdot 12\text{H}_2\text{O}$ ,  $\text{NaH}_2\text{PO}_4 \cdot 2\text{H}_2\text{O}$ , NaCl, NaOH, KCl,  $\text{KH}_2\text{PO}_4$ , HCl) for buffer preparation were brought from Sinopharm Chemical Reagent Co., Ltd (Shanghai, China).

**Citation:** Zhang, B.; Tang, W.-S.; Ding, S.-N. Dual-Signal-Encoded Barcodes with Low Background Signal for High-Sensitivity Analysis of Multiple Tumor Markers. *Chemosensors* **2022**, *10*, 142. <https://doi.org/10.3390/chemosensors10040142>

Academic Editor: Christos Kokkinos

Received: 20 March 2022

Accepted: 7 April 2022

Published: 9 April 2022

**Publisher's Note:** MDPI stays neutral with regard to jurisdictional claims in published maps and institutional affiliations.

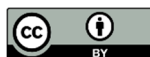

**Copyright:** © 2022 by the authors. Licensee MDPI, Basel, Switzerland. This article is an open access article distributed under the terms and conditions of the Creative Commons Attribution (CC BY) license (<https://creativecommons.org/licenses/by/4.0/>).

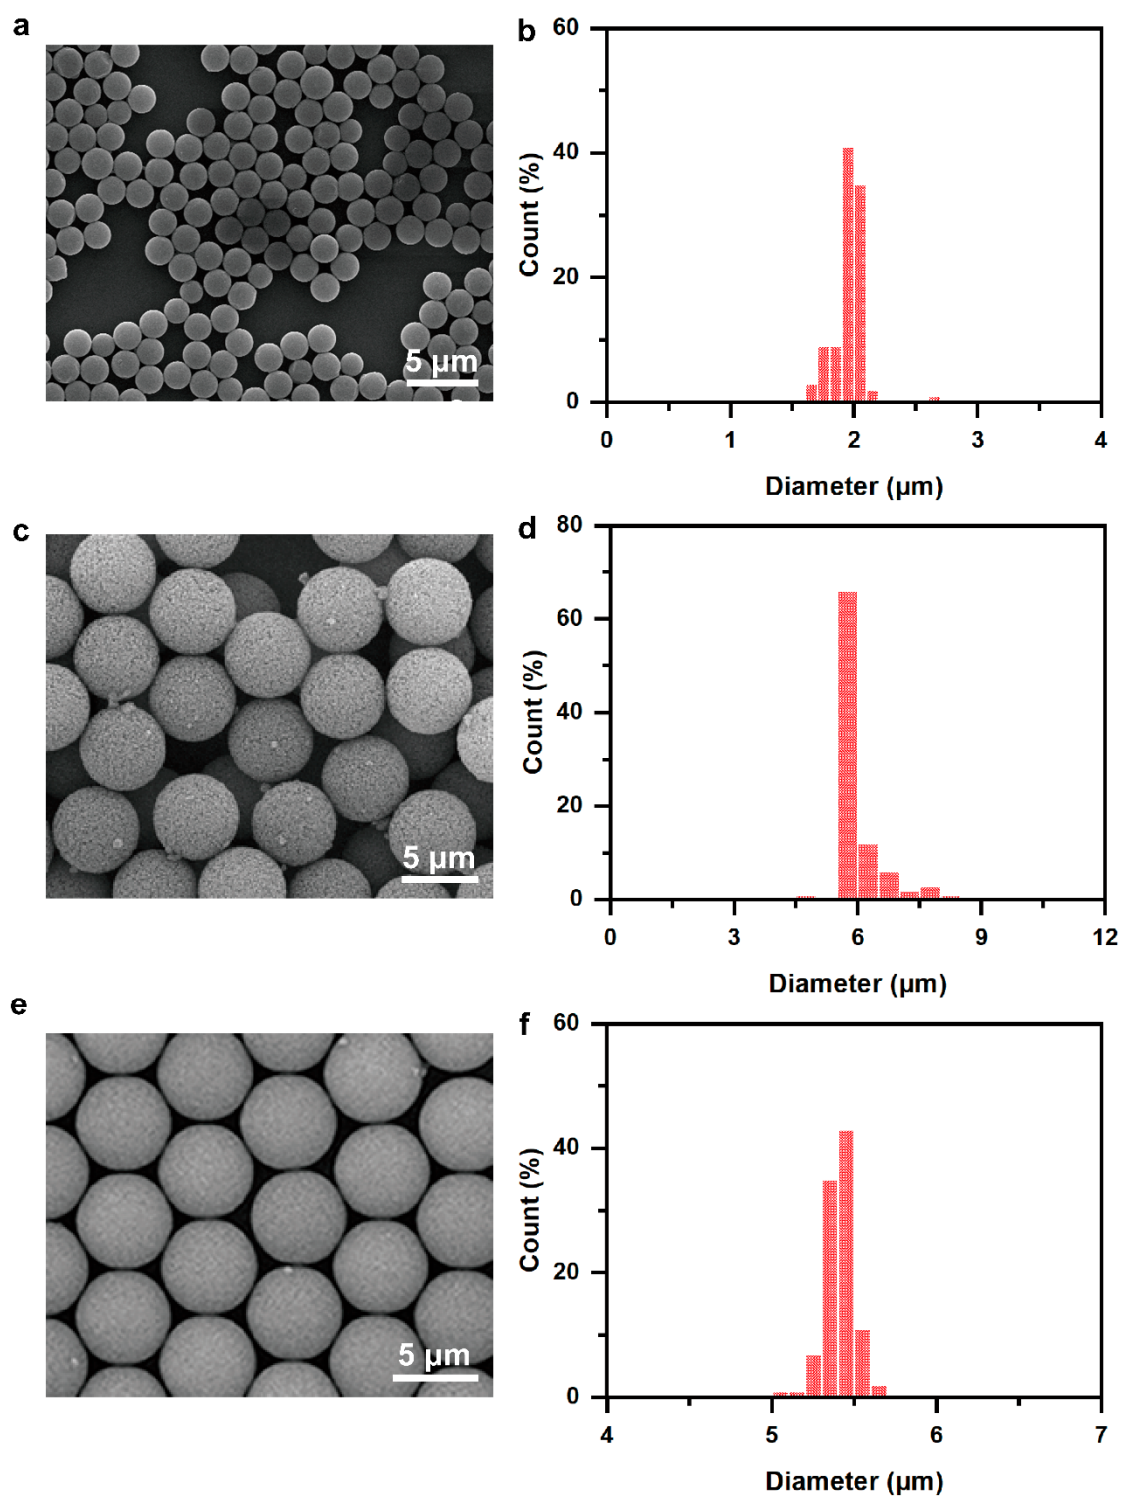

**Figure S1.** Representative SEM images and microparticle size statistics of MBs. (a) and (b) SEM image and microparticle size statistics of 1.96  $\mu\text{m}$  PS-S, respectively. (c) and (d) SEM image and microparticle size statistics of 5.87  $\mu\text{m}$  PS-L, respectively. (e) and (f) SEM image and microparticle size statistics of 5.44  $\mu\text{m}$  SiO<sub>2</sub>-L, respectively.

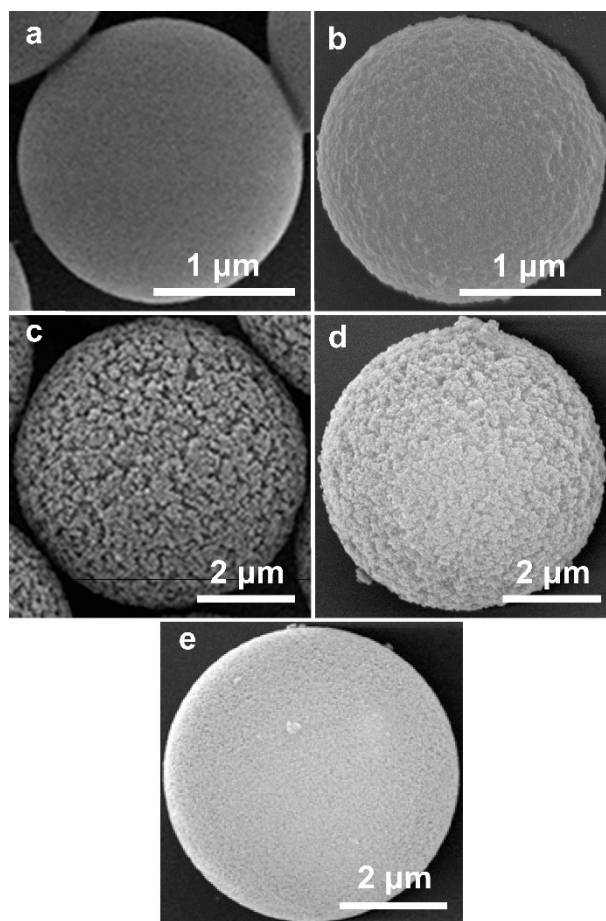

**Figure S2.** SEM images with high magnification of various PS and SiO<sub>2</sub>. PS-S before (a) and after (b) coated by SiO<sub>2</sub>, respectively. PS-L before (c) and after (d) coated by SiO<sub>2</sub>, respectively. SiO<sub>2</sub>-L (e).

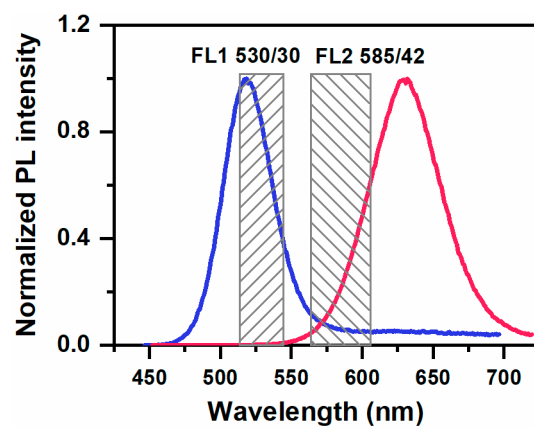

**Figure S3.** The relationship between the PL peak wavelength of 522 nm (blue) and 630 nm (red) CdTe.

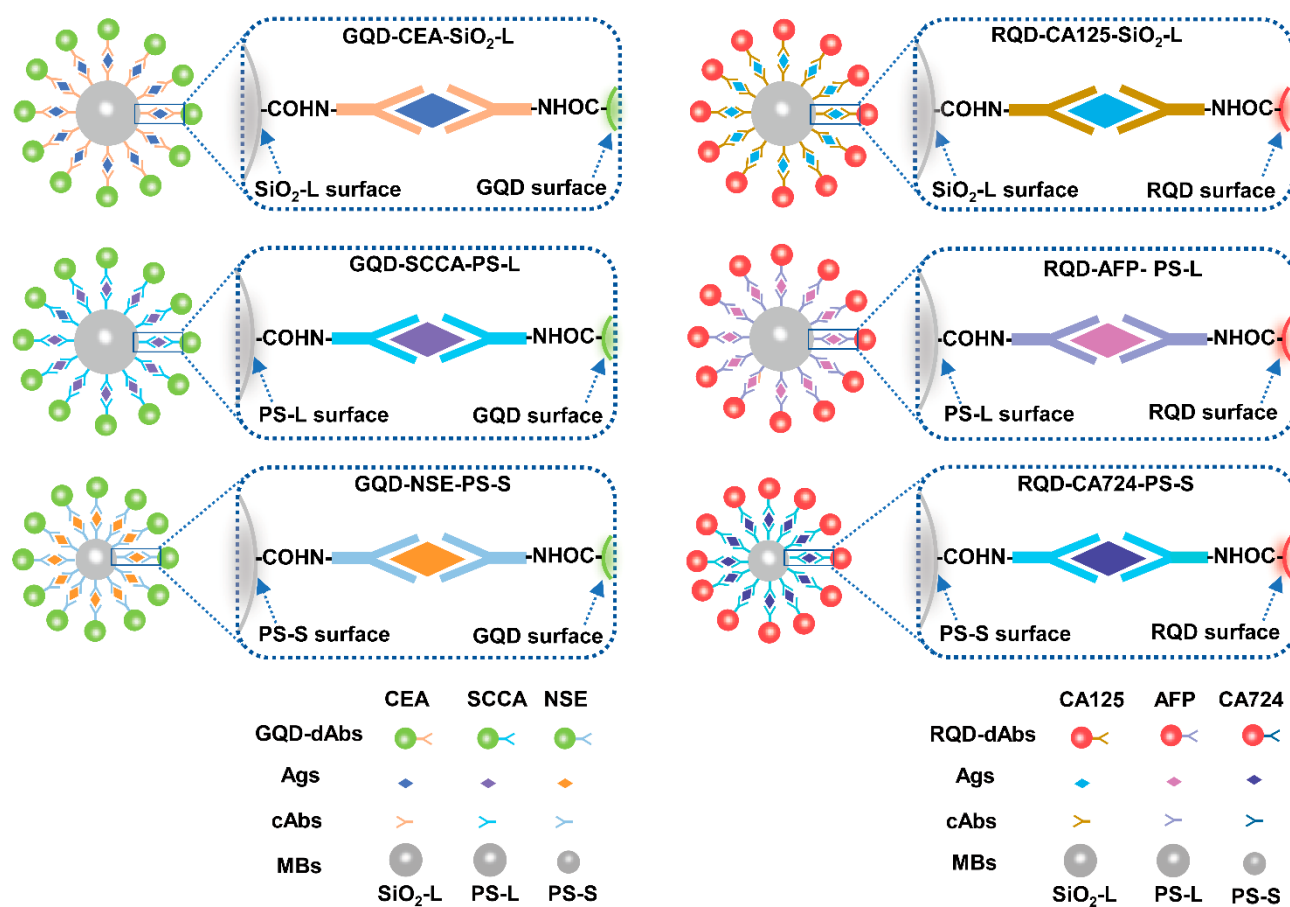

**Figure S4.** Schematic representation of GQDs or RQDs were coupled to the surface of MBs (SiO<sub>2</sub>-L, PS-L and PS-S), by sandwich immune structure.

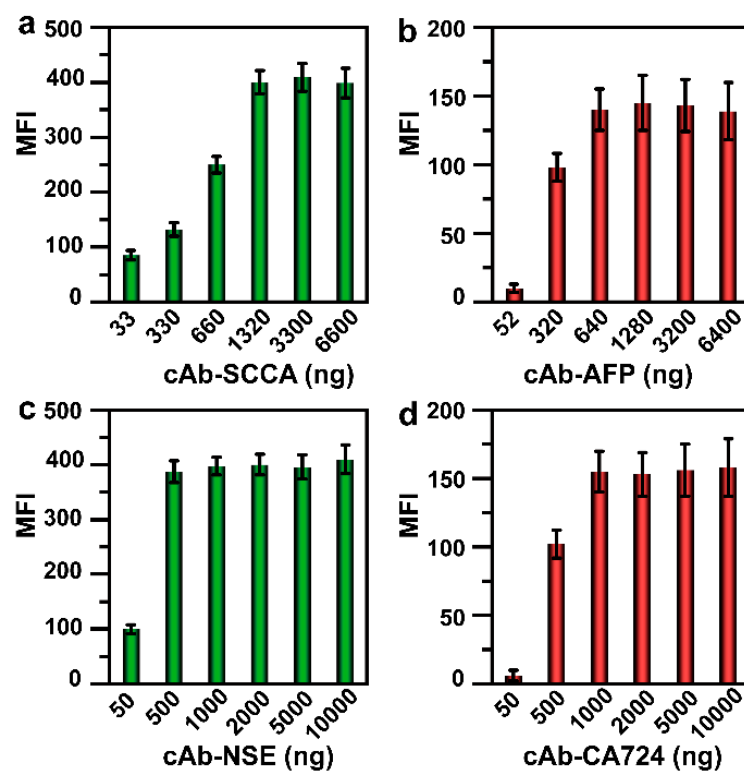

**Figure S5.** Optimization of added amounts of cAb. (a) GQD-SCCA-PS-L with 33, 330, 660, 1320, 3300, and 6600 ng of cAb-SCCA. Optimal amount of cAb-SCCA (1320 ng). (b) RQD-AFP-PS-L with

52, 320, 640, 1280, 3200, and 6400 ng of cAb- AFP. Optimal amount of cAb-AFP (640 ng). (c) QGD-NSE-PS-S with 50, 500, 1000, 2000, 5000, and 10,000 ng of cAb-NSE. Optimal amount of cAb-NSE (500 ng). (d) RQD-CA724-PS-S with 50, 500, 1000, 2000, 5000, and 10,000 ng of cAb-CA724. Optimal amount of cAb-CA724 (1000 ng).

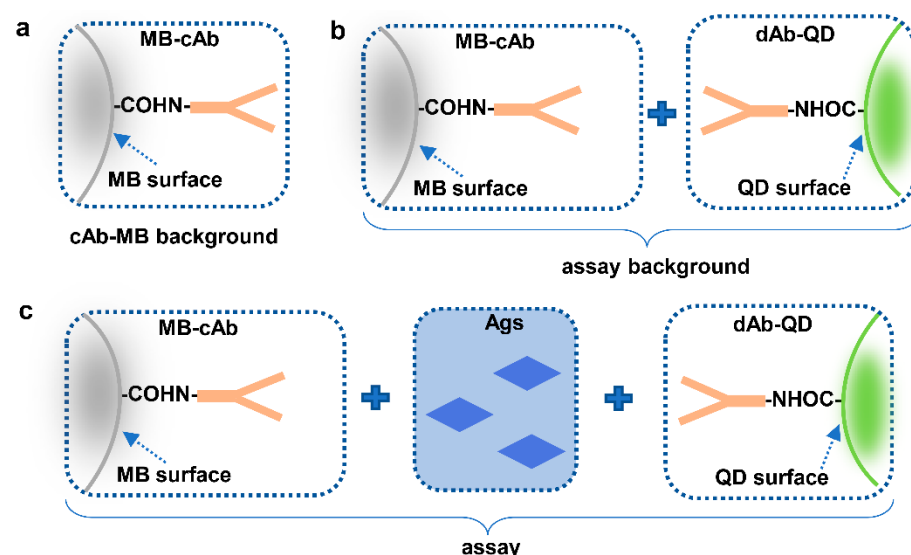

**Figure S6.** Schematic illustration of combinatorial experiments of 6-plex specific and non-specific binding. The cAb-MBs were incubated with different detection reagents, individual cAb-MB (a), cAb-MB mixture with dAb-QD (b), and cAb-MB mixture with Ags, followed by dAb-QD (c).

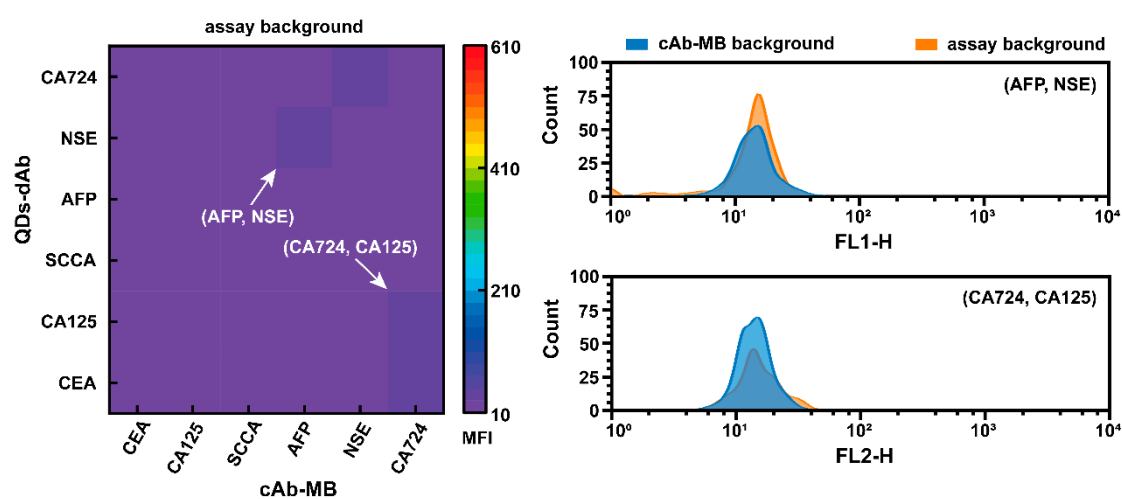

**Figure S7.** Combinatorial experiments of 6-plex specific and non-specific binding. cAb-MB (column) and QDs-dAb (row) incubation without Ag. Histograms of the count for (cAb, dAb) are on the right.

**Table S1.** Limit of detection (LOD) of six-plexed tumor markers biodetection compared to other the data of SAT.

| Tumor marker | LOD        | Reference |
|--------------|------------|-----------|
| CEA          | 1.48 ng/mL | [1]       |
|              | 0.03 ng/mL | [2]       |
|              | 0.05 ng/mL | This work |
| CA125        | 0.99 IU/mL | [1]       |
|              | 1.0 KU/L   | [2]       |
|              | 0.92 KU/L  | This work |
| SCCA         | 0.39 ng/mL | [1]       |
|              | 0.28 ng/mL | This work |

---

|       |            |           |
|-------|------------|-----------|
| AFP   | 0.17 ng/mL | [2]       |
|       | 0.01 ng/mL | [2]       |
|       | 0.09 ng/mL | This work |
| NSE   | 0.18 ng/mL | [1]       |
|       | 0.16 ng/mL | This work |
| CA724 | 0.36 KU/L  | This work |

---

## Reference

1. Wang, Y.; Chen, C.; He, J.; Cao, Y.; Fang, X.; Chi, X.; Yi, J.; Wu, J.; Guo, Q.; Masoomi, H.; et al. Precisely Encoded Barcodes through the Structure-Fluorescence Combinational Strategy: A Flexible, Robust, and Versatile Multiplexed Biodetection Platform with Ultrahigh Encoding Capacities. *Small* **2021**, *17*, 2100315. <https://doi.org/10.1002/sml.202100315>.
2. Leng, Y.; Wu, W.; Li, L.; Lin, K.; Sun, K. Magnetic/Fluorescent Barcodes Based on Cadmium-Free Near-Infrared-Emitting Quantum Dots for Multiplexed Detection. *Adv. Funct. Mater.* **2016**, *26*, 7581. <https://doi.org/10.1002/adfm.201602900>.
